# Supplementary material
Source: PubMed Central journal article supplement (PMC1345726)

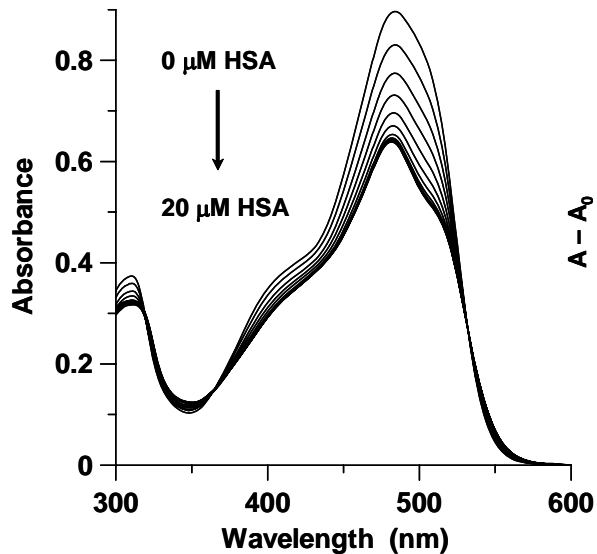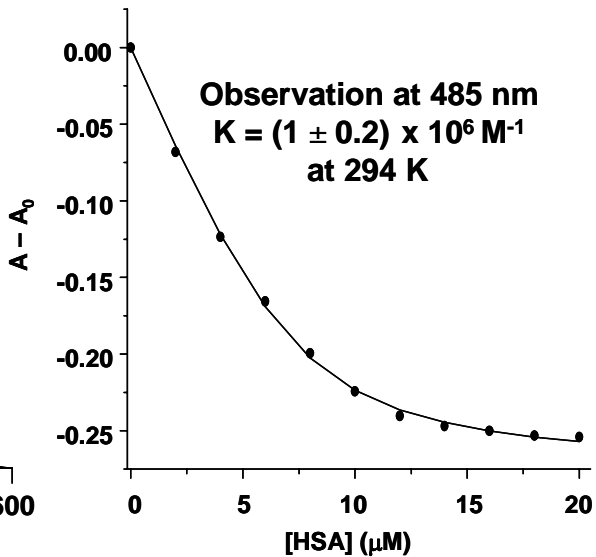

Supplement: pnas_0507459102_1.pdf [file pnas_0507459102_1.pdf]

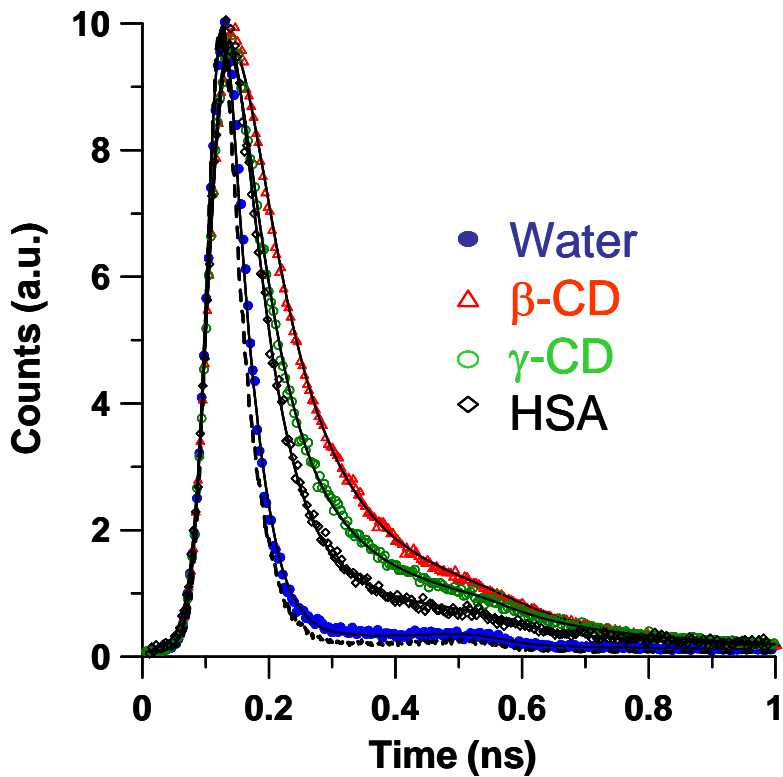

Supplement: pnas_0507459102_2.pdf [file pnas_0507459102_2.pdf]

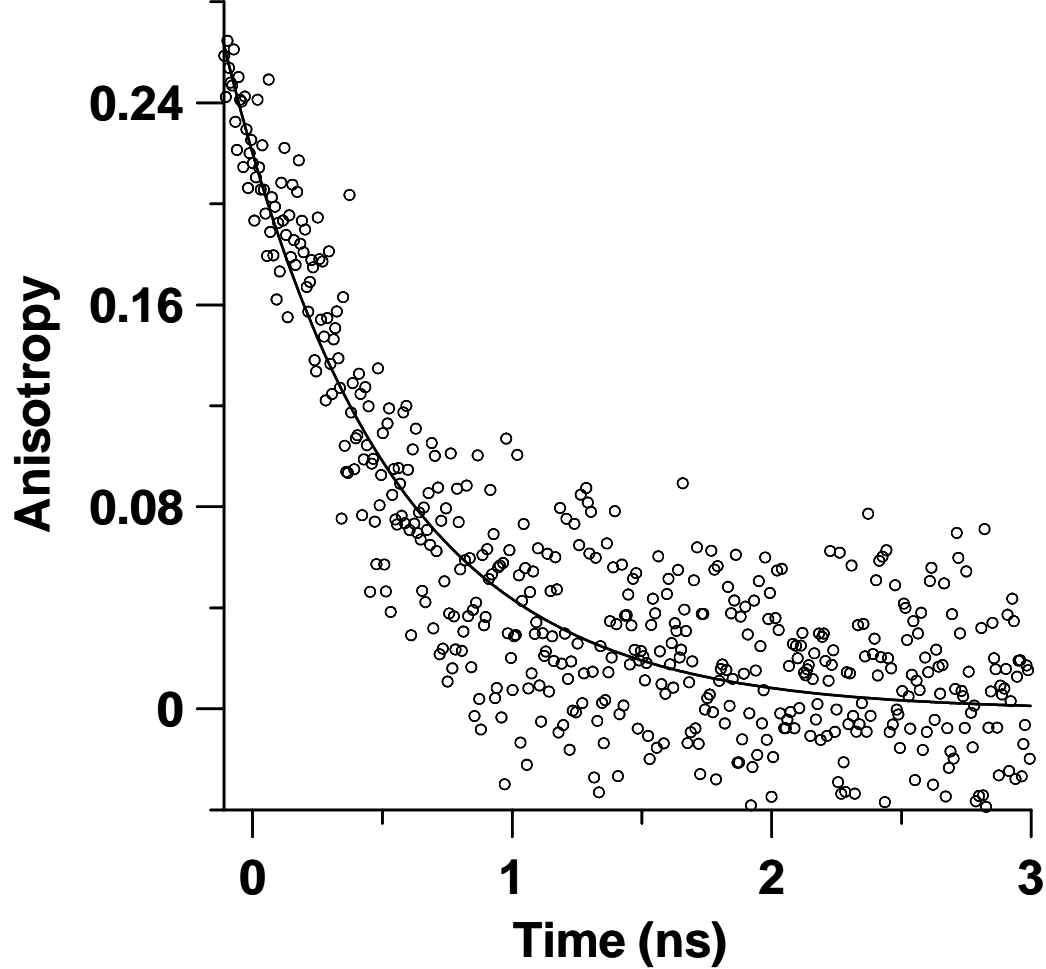

Supplement: pnas_0507459102_3.pdf [file pnas_0507459102_3.pdf]
